# Supplementary material
Source: MDPI journal article supplement (https://www.mdpi.com/2076-3417/13/18/10062)
Supplement: s1 [file s1]

Table S1. Normalization.

| T(°C)    | VB (mm)  | Ra (μm)  | P(kW)    | Cn (dB)  |
|----------|----------|----------|----------|----------|
| 0.688679 | 0.55102  | 0.506024 | 0.888617 | 0.986387 |
| 0.899384 | 0.586957 | 0.34903  | 0.689459 | 0.977138 |
| 0.524551 | 0.428571 | 0.309202 | 0.625323 | 0.974385 |
| 0.361983 | 0.341772 | 0.180645 | 0.613176 | 0.95446  |
| 0.555133 | 0.402985 | 0.41791  | 0.795181 | 0.992952 |
| 1        | 1        | 0.444444 | 1        | 1        |
| 0.162342 | 0.303371 | 0.306197 | 0.523055 | 0.924311 |
| 0.286275 | 0.421875 | 0.21856  | 0.553354 | 0.932124 |
| 0.634783 | 0.658537 | 1        | 0.717391 | 0.987667 |
| 0.365    | 0.333333 | 0.396226 | 0.552511 | 0.960849 |
| 0.504028 | 0.931034 | 0.272727 | 0.759414 | 0.954101 |
| 0.463002 | 0.5625   | 0.157107 | 0.632956 | 0.923974 |
| 0.203816 | 0.284211 | 0.361549 | 0.540984 | 0.923077 |
| 0.301861 | 0.5      | 0.309582 | 0.546687 | 0.915413 |
| 0.51049  | 0.627907 | 0.184886 | 0.694737 | 0.949339 |
| 0.58871  | 0.5      | 0.115915 | 0.789989 | 0.935678 |

Table S2. Calculation for determining  $P_{ij}$  and  $E_{ij}$ 

| $P_{ij}$ |          |          |          |          | $E_{ij}$ |          |          |          |          |
|----------|----------|----------|----------|----------|----------|----------|----------|----------|----------|
| T(°C)    | VB (mm)  | Ra (μm)  | P(kW)    | Cn (dB)  | T(°C)    | VB (mm)  | Ra (μm)  | P(kW)    | Cn (dB)  |
| 0.036281 | 0.052745 | 0.033112 | 0.046376 | 0.060509 | -0.12032 | -0.15519 | -0.11284 | -0.14242 | -0.16973 |
| 0.027781 | 0.049516 | 0.048005 | 0.059772 | 0.061082 | -0.09955 | -0.14882 | -0.14577 | -0.16839 | -0.17076 |
| 0.047633 | 0.067815 | 0.054189 | 0.065902 | 0.061255 | -0.14501 | -0.18249 | -0.15798 | -0.17923 | -0.17107 |
| 0.069025 | 0.085038 | 0.092753 | 0.067208 | 0.062533 | -0.18452 | -0.20959 | -0.22055 | -0.18146 | -0.17335 |
| 0.045009 | 0.072121 | 0.040093 | 0.051825 | 0.060109 | -0.13957 | -0.18963 | -0.12896 | -0.1534  | -0.169   |
| 0.024986 | 0.029064 | 0.037699 | 0.04121  | 0.059686 | -0.09218 | -0.10283 | -0.12358 | -0.13142 | -0.16823 |
| 0.153908 | 0.095802 | 0.054721 | 0.078788 | 0.064573 | -0.28802 | -0.2247  | -0.15899 | -0.2002  | -0.17693 |
| 0.087279 | 0.068891 | 0.076662 | 0.074474 | 0.064032 | -0.21284 | -0.1843  | -0.1969  | -0.19343 | -0.17598 |
| 0.039361 | 0.044133 | 0.016755 | 0.057445 | 0.060431 | -0.12733 | -0.13772 | -0.06851 | -0.16412 | -0.16958 |
| 0.068454 | 0.087191 | 0.042287 | 0.074587 | 0.062118 | -0.18357 | -0.21272 | -0.13377 | -0.19361 | -0.17261 |
| 0.049572 | 0.031216 | 0.061436 | 0.054266 | 0.062557 | -0.14893 | -0.10822 | -0.17139 | -0.15812 | -0.17339 |
| 0.053965 | 0.051668 | 0.106649 | 0.065108 | 0.064597 | -0.15755 | -0.15309 | -0.2387  | -0.17786 | -0.17697 |
| 0.12259  | 0.10226  | 0.046343 | 0.076176 | 0.064659 | -0.25731 | -0.23318 | -0.14235 | -0.19613 | -0.17708 |
| 0.082772 | 0.058127 | 0.054122 | 0.075382 | 0.065201 | -0.20624 | -0.16538 | -0.15785 | -0.19488 | -0.17802 |
| 0.048945 | 0.046286 | 0.090625 | 0.059318 | 0.062871 | -0.14767 | -0.14223 | -0.21759 | -0.16756 | -0.17394 |
| 0.042442 | 0.058127 | 0.144548 | 0.052166 | 0.063789 | -0.1341  | -0.16538 | -0.27958 | -0.15406 | -0.17556 |

**Table S3.** Calculated values of normalized entropy  $E_{ij}$  and weight ( $W_j$ ).

| Evaluation | T(°C)    | VB (mm)  | Ra (μm)  | P(kW)    | Cn (dB)  |
|------------|----------|----------|----------|----------|----------|
| SUM        | -2.64471 | -2.71547 | -2.6553  | -2.75628 | -2.77219 |
| $E_{ij}$   | 0.953877 | 0.979399 | 0.957699 | 0.994119 | 0.999855 |
| $W_j$      | 0.400888 | 0.179061 | 0.367668 | 0.05112  | 0.001264 |

**Table S4.** Total Relative Importance values based on WSM.

| T(°C)    | VB (mm)  | Ra (μm)  | P(kW)    | Cn (dB)  | $Q_i^{(1)}$ |
|----------|----------|----------|----------|----------|-------------|
| 0.276083 | 0.098666 | 0.186049 | 0.045426 | 0.001247 | 0.607471    |
| 0.360552 | 0.105101 | 0.128327 | 0.035245 | 0.001236 | 0.63046     |
| 0.210286 | 0.07674  | 0.113684 | 0.031966 | 0.001232 | 0.433908    |
| 0.145115 | 0.061198 | 0.066417 | 0.031345 | 0.001207 | 0.305282    |
| 0.222546 | 0.072159 | 0.153652 | 0.040649 | 0.001256 | 0.490262    |
| 0.400888 | 0.179061 | 0.163408 | 0.05112  | 0.001264 | 0.79574     |
| 0.065081 | 0.054322 | 0.112579 | 0.026738 | 0.001169 | 0.259889    |
| 0.114764 | 0.075541 | 0.080358 | 0.028287 | 0.001179 | 0.300129    |
| 0.254477 | 0.117918 | 0.367668 | 0.036673 | 0.001249 | 0.777984    |
| 0.146324 | 0.059687 | 0.14568  | 0.028244 | 0.001215 | 0.38115     |
| 0.202058 | 0.166712 | 0.100273 | 0.038821 | 0.001206 | 0.50907     |
| 0.185612 | 0.100722 | 0.057763 | 0.032357 | 0.001168 | 0.377621    |
| 0.081707 | 0.050891 | 0.13293  | 0.027655 | 0.001167 | 0.29435     |
| 0.121012 | 0.08953  | 0.113823 | 0.027946 | 0.001157 | 0.35347     |
| 0.204649 | 0.12433  | 0.067977 | 0.035515 | 0.0012   | 0.421774    |
| 0.236006 | 0.08953  | 0.042618 | 0.040384 | 0.001183 | 0.409722    |

**Table S5.** Total Relative Importance values based on WPM.

| T(°C)    | VB (mm)  | Ra (μm)  | P(kW)    | Cn (dB)  | $Q_i^{(2)}$     |
|----------|----------|----------|----------|----------|-----------------|
| 0.861119 | 0.89878  | 0.778455 | 0.993982 | 0.999983 | <b>0.598853</b> |
| 0.958379 | 0.909005 | 0.679087 | 0.981171 | 0.999971 | <b>0.580445</b> |
| 0.772087 | 0.859231 | 0.6495   | 0.976286 | 0.999967 | <b>0.420647</b> |
| 0.665401 | 0.825108 | 0.533039 | 0.975307 | 0.999941 | <b>0.28541</b>  |
| 0.789827 | 0.849812 | 0.725579 | 0.988352 | 0.999991 | <b>0.481335</b> |
| 1        | 1        | 0.742188 | 1        | 1        | <b>0.742188</b> |
| 0.482472 | 0.807685 | 0.647171 | 0.967414 | 0.9999   | <b>0.243951</b> |
| 0.605663 | 0.856811 | 0.571718 | 0.970202 | 0.999911 | <b>0.28782</b>  |
| 0.833441 | 0.927929 | 1        | 0.983165 | 0.999984 | <b>0.760342</b> |
| 0.667619 | 0.821422 | 0.711503 | 0.970127 | 0.99995  | <b>0.378511</b> |
| 0.759832 | 0.987286 | 0.620206 | 0.98603  | 0.999941 | <b>0.458734</b> |
| 0.734406 | 0.902104 | 0.506369 | 0.976891 | 0.9999   | <b>0.32769</b>  |
| 0.528545 | 0.798304 | 0.687943 | 0.969082 | 0.999899 | <b>0.281267</b> |
| 0.618673 | 0.883278 | 0.649793 | 0.969601 | 0.999888 | <b>0.344253</b> |
| 0.763722 | 0.920049 | 0.537607 | 0.981553 | 0.999934 | <b>0.370763</b> |
| 0.808642 | 0.883278 | 0.452809 | 0.988022 | 0.999916 | <b>0.31952</b>  |
